# Supplementary material for: Single Virus Genomics: A New Tool for Virus Discovery
Source: PLOS journal article supplement (doi:10.1371/journal.pone.0017722), 2011-03-23
Supplement: S3 (10.1371/journal.pone.0017722.s003) [file journal.pone.0017722.s003]

|                        |            |
|------------------------|------------|
| Total reference length | 48,502     |
| GC contents in %       | 49.9       |
| Total read count       | 61,406     |
| Mean read length       | 361.6      |
| Total read length      | 22,202,436 |
| Total consensus length | 48,497     |
| Zero coverage length   | 5          |
| Minimum coverage       | 0          |
| Maximum coverage       | 2,000      |
| Average coverage       | 436.9      |
